# Supplementary material for: Modulation of plant chemistry by beneficial root microbiota
Source: Royal Society of Chemistry journal article supplement (doi:10.1039/c7np00057j), 2018-01-01
Supplement: c7np00057j1.zip [file Etalo_et_al_Supplementary_Tables_S1_and_S2 (4).xlsx]

## Sheet: Supplementary table list
Supplementary Table S1. Overview of studies on alterations in the chemistry of model, medicinal, crop and ornamental plant species induced by beneficial bacteria
Supplementary Table S2. Overview of different bacterial genera studied for their impact on the chemistry of different plant species

## Sheet: Supplementary Table 1
Supplementary Table S1. Overview of studies on alterations in the chemistry of model, medicinal, crop and ornamental plant species induced by beneficial bacteria
Plant Genus and Species	Bacterial Genus and Species	Treatment	Plant phenotype	Analytical tools	Multivariate statistical analysis	Change in phytochemistry	Compound group	References
Model
Jacobaea vulgaris	Soil-borne microorganisms	Soil treatment	Not determined	HPLC-MS/MS		Levels of pyrrolizidine alkaloids (PAs) in shoots and roots were affected by soil type and microbial community	Alkaloid	1
Arabidopsis thaliana	Bacillus subtilis GB03	Volatile exposure	Growth promotion	RT-PCR		Flavonoid pathway in seedlings was upregulated	Flavonoid pathways	2
Arabidopsis thaliana	Burkholderia phytofirmans PsJN	Seed, soil, leaf inoculations	Growth promotion	GC-MS, LC-MS, UPLC-ESI-MS/MS, (Non-targeted metabolomics)		Octanoic acid level increased. Levels of other organic acids were differentially regulated depending on type of inoculation	Organic acid	3
Arabidopsis thaliana	Pseudomonas fluorescens SS101	Root inoculation	Anti-herbivory, disease resistance, growth promotion	LC-QTOF-MS (Non-targeted metabolomics), microarrays		Changes in glucosinolates, coumarins, flavonoids and camalexin levels in root and leaves	Coumarin, flavonoid, glucosinolate	4
Arabidopsis thaliana	Pseudomonas fluorescens WCS417r	Soil inoculation	Anti-herbivory, growth promotion	GC-MS	Projection to Latent Structures Discriminant Analysis (PLS-DA)	Lower levels of volatiles, terpene (E)-α-bergamotene, aromatics, methylsalicylate and lilial, emission	Phenolics, terpenoid	5
Arabidopsis thaliana	Slurry contain microbes	Soil inoculation	Anti-herbivory, growth promotion	GC-MS		Levels of phenolics, sugars, sugar alcohols and many other unknown metabolites in leaves were differentially regulated	Glycoside, phenolics, various metabolites	6
Arabidopsis thaliana	Bacillus amyloliquefaciens (GB03)	Volatile exposure, soil inoculation	Anti-herbivory	UHPLC-PDA, HPLC-PDA-MS, UV/Reaction-based detection		Levels of glucosinolates in shoots and roots were increased	Glucosinolate	7
Medicinal
Aloe barbadensis	Burkholderia gladioli, Enterobacter hormaechei, Serratia marcescens, Pseudomonas synxantha	Root inoculation, soil inoculation	Not determined	HPLC		Higher level of aloin-A (barbaloin) in leaves in response to bacteria co-treatment	Quinone	8
Arnebia hispidissima	Azotobacter chroococcum (ATCC 9043, BCRC 10599, CCRC 10599, DSM 2286, IAM 12666)	Hairy root culture	Growth promotion	HPLC		Higher level of propionylalkannin in hairy roots culture treated with ATCC 9043	Quinone	9
Artemisia annua	Azotobacter chroococcum strain W-5 with fungus Piriformospora indica strain DSM 11827	Soil inoculation	Growth promotion	HPLC		Higher level of artemisinin in leaves of plants treated by bacteria-fungus combination	Terpenoid	10
Artemisia annua	Bacillus subtilis with AM fungi, Stenotrophomonas sp.	Soil inoculation	Growth promotion	HP-TLC		Higher level of artemisinin in leaves of plants treated by bacteria-fungus combination	Terpenoid	11
Artemisia annua	Pseudonocardia sp. YIM 63111	Soil inoculation	Not determined	HPLC		Higher level of artemisinin in leaves of treated plants	Terpenoid	12
Atractylodes lancea	Acinetobacter sp. ALEB16	Root inoculation	Not determined	GC, HPLC		Higher levels of hinesol, β-eudesmol, atractylone and atractylodin in plantlets in response to the treatment	Polyethylene alkyne, terpenoid	13
Bacopa monnieri	Bacillus pumilus (STR2), Exiguobacterium oxidotolerans (STR36)	Soil inoculation	Growth promotion	HP-TLC, HPLC		Higher level of bacoside-A in leaves in response to STR36 treatment	Terpenoid	14
Catharanthus roseus	Micrococcus sp (V3), Staphylococcus sciuri (V1)	Seed inoculation	Growth promotion	HPLC		Higher level of vindoline in leaves by all bacteria treatments. Higher level of serpentine ajmalicine in roots by V3 treatment	Alkaloid	15
Catharanthus roseus	Pseudomonas fluorescens	Soil inoculation	Drought tolerance	p-TLC, UV/Reaction-based detection		Higher level of ajmalicine in roots	Alkaloid	16
Catharanthus roseus	Pseudomonas fluorescens	Soil inoculation	Not determined	HPLC, UV		Higher levels of ajmalicine, catharanthine, tabersonine, serpentine, and vindoline in roots	Alkaloid	17
Codonopsis pilosula	Bacillus amyloliquefaciens GB03	Soil inoculation	Growth promotion	HPLC		Higher level of lobetyolin in roots	Polyacetylene alkyne	18
Coleus forskohlii	Pseudomonas fasciculatum CRC1, AM fungus Glomus fasciculatum	Root inoculation	Disease resistance	HPLC		Higher level of forskolin in roots, both for treatment with single bacterial species and with bacteria-fungus co-treatment	Terpenoid	19
Datura innoxia	Agrobacterium rhizogenes TR7 strain	Introduction into hydroponics	Growth promotion	LC/ESI-HRMS, MS/MS	Principal Component Analysis (PCA) and PLS-DA	Higher levels of hyoscyamine and scopolamine in shoots and roots	Alkaloid	20
Hyoscyamus niger	10 strains of Pseudomonas putida, 10 strains of Pseudomonas fluorescens	Root and soil inoculation	Growth promotion	GC-MS		Higher levels of hyoscyamine and scopolamine in shoots and roots	Alkaloid	21
Panax ginseng	Paenibacillus polymyxa	Leaf inoculation	Growth promotion, disease resistance	HPLC		Higher levels of ginsenosides in roots	Terpenoid	22
Papaver somniferum	Janibacter sp., Arthrobacter sp., Kocuria sp., Microbacterium sp., Marmoricola sp., Bacillus lichniformis, B. subtilis, B. circulans, B. amyloliquefaciens, B. tequilensis and B. sp., Acinetobacter sp.	Seed and soil inoculation	Growth promotion	HPLC		Higher levels of morphine, papaverine, and noscapine in capsules with SM4B. Level of benzylisoquinoline alkaloid was increased when plants were treated with all bacterial strains	Alkaloid	23
Papaver somniferum	Stenotrophomonas maltophilia N5.18	Root and leaf inoculation	Growth promotion	HPLC		Lower levels of oripavine and thebaine in shoots and roots	Alkaloid	24
Salvia miltiorrhiza	Bacillus cereus	Hairy root culture	Not determined	HPLC		Higher level of tanshinone in hairy root culture	Quinone	25
Salvia miltiorrhiza	Rhizobium radiobacter (B2), Pseudomonas brassicacearum sub sp. neoaurantiaca (B1), Pseudomonas thivervalensis (B3), Pseudomonas frederiksbergensis (B4, B5)	Hairy root culture	Not determined	HPLC		Higher level of tanshinone in hairy roots culture with B1-B4. Lower levels of rosmarinic acid and salvianolic acid with B2-B5. Levels of dihydrotanshinone I and cryptotanshinone were differentially regulated by each treatment	Quinone	26
Salvia officinalis	Pseudomonas fluorescens (Pf Ap1, Pf Ap18), P. putida (Pp Ap9, Pp Ap14)	Soil, leaf, cutting inoculation	Disease resistance, Growth promotion	GC-MS, UV/Reaction based detection		Levels of total phenolics and flavonoids in shoots increased by single bacterial species treatment. Essential oil yield increased by single treatment and by bacterial consortium. Levels of cis-thujene, camphor, and 1,8-cineol in shoots were differently regulated by treatments	AHC*, flavonoid, phenolics	27
Stevia rebaudiana	Bacillus polymyxa, Azotobacter chroococcum, Pseudomonas putida	Soil inoculation	Growth promotion	HPLC		Higher level of stevioside in leaves by single bacteria and bacteria-fungus co-treatment	Terpenoid	28
Stevia rebaudiana	Burkholderia gladioli 10216, 10217, Enterobacter aerogenes 10208, Serratia marcescens 10238	Soil inoculation	Growth promotion	HPLC		Higher levels of stevioside and rebaudioside-A in leaves	Terpenoid	29
Stevia rebaudiana	Rhodopseudomonas sp.	Leaf inoculation	Growth promotion	HPLC		Higher level of stevioside in leaves	Terpenoid	30
Taverniera cuneifolia	Agrobacterium rhizogenes, Agrobacterium tumefaciens, Rhizobium leguminosarum, Bacillus aminovorans, Bacillus cereus	Hairy root culture	Growth promotion	HPLC		Higher level of glycyrrhizic acid in hairy roots culture by A. rhizogenes, R. leguminosarum, B. aminovorans, and B. cereus	Terpenoid	31
Crop
Arachis hypogaea	Rhizobium sp.	Soil inoculation	Not determined	Paper chromatography, UV/Reaction based detection		Levels of trans-caffeic acid, chlorogenic acid, cis-caffeic acid, protocatechuic acid, cis-p-coumaric acid, p-hydroxy benzoic acid, trans-p-coumaric acid, trans-ferulic acid, vanillic acid and cis-ferulic acid in shoot and root were differentially regulated	Organic acid, phenolics	32
Capsicum annuum	Rhizobium leguminosarum PETP01, TVP08	Seed inoculation	Not determined	HPLC-DAD		Lower level of phenolic compounds in fruits. Higher levels of caffeic acid and ferulic acid in leaves treated with PETP01	Organic acid, phenolics	33
Capsicum annuum	Rhizobium leguminosarum PETP01, TVP08	Seed inoculation	Not determined	HPLC-DAD, GC-IT/MS	PCA	Increased sterols and triterpenes levels in leaves by PETP01. Higher levels of monoterpenes and miscellaneous compounds in leaves in all strains. In fruit, higher levels of aldehydes and ester, and lower levels of monoterpenes, norisoprenoids and 2-isobutyl-3-methoxypyrazine with all bacteria treatments	Terpenoid	34
Chamomilla recutita	Bacillus subtilis Co1-6, Paenibacillus polymyxa Mc5Re-14	Root inoculation	Not determined	LC-MS		Higher level of apigenin-7-O-glucoside in flower by all bacteria treatments	Flavonoid	35
Cicer arietinum	Pseudomonas fluorescens (Pfs1-7)	Seed inoculation	Disease resistance	HPLC		Differential regulation of the levels of gallic, ferulic, chlorogenic, and cinnamic acid in leaves and roots by each bacteria treatment	Organic acid, phenolics	36
Cicer arietinum	Pseudomonas fluorescens Pf4, P. aeruginosa Pag	Leaf treatment	Disease resistance	HPLC		Phenolic acids, tannic, gallic, caffeic, ferulic, o-Coumaric, and chlorogenic acid, levels in leaves were differently regulated by each bacteria treatment	Organic acid, phenolics	37
Cicer arietinum	Rhizobium leguminosarum RL091, Pseudomonas aeruginosa PHU094	Seed inoculation	Disease resistance	UV/Reaction based detection		Higher level of total polyphenolic in leaves of plant treated with bacteria consortium	Phenolics	38
Cicer arietinum	Rhizobium leguminosarum RL091, Pseudomonas fluorescens PHU094	Seed inoculation	Not determined	HPLC, UV/Reaction based detection		Higher levels of total phenolics and flavonoids in seeds and pericarp in response to bacteria-fungus co-treatment	Flavonoid, organic acid, phenolics	39
Cucumis sativus	Promicromonospora sp. SE188, Burkholderia cepacia SE4, Acinetobacter calcoaceticus SE370	Seed inoculation	Drought tolerance, Salt tolerance	GC-MS, HPLC, UV/Reaction based detection		Higher levels of gibberellin, salicylic acid, and total polyphenols in shoots with all bacteria treatments	Organic acid, phenolics	40
Curcuma longa	Bacillus megaterium, Azospirillum amazonese, Azotobacter sp. with AMF	Seed inoculation	Not determined	UV/Reaction based detection		Higher levels of total phenolics, flavonoids and curcumin in turmeric rhizomes in response to bacteria-fungus co-treatment	Curcuminoid, flavonoid, phenolics	41
Daucus carota	Pseudomonas spp. OFT2, OFT5 and RH7	Seed inoculation	Growth promotion	GC-MS	Hierarchical Cluster Analysis (HCA) and PCA	Differential regulation of volatiles, 1-penten-3-ol, (E)-2-hexenal, α-copaene, β−caryophyllene, α−humulene, and n-octanal and (E)-2-decenal in leaves and roots by each bacteria treatment	Volatiles	42
Dolichos biflorus	Pseudomonas fisi	Leaf inoculation	Not determined	NMR, MS		Productions of dolichins A and B in leaves	Flavonoid	43
Fragaria x ananassa var. selva	Pseudomonas fluorescens Pf4, Pseudomonas sp. 5Vm1K with AM fungi	Soil inoculation	Growth promotion	LC/ESI-MS, Q-TOF MS		Increased level of cyanidin-3-glucosidein in fruits by single bacterial species and by bacteria-fungus co-treatment	Anthocyanin	44
Glycine max	Streptomyces sp., Azotobacter chroococcum	Soil inoculation	Not determined	HPLC, UV/Reaction based detection		Higher levels of daidzein and genistin in seedlings by bacteria treatments. Increased levels of proanthocyanidins in leaves by bacteria consortium. Changes of total flavonoids and isoflavonoids levels in leaves and roots by bacteria treatments along with growth stages	Flavonoid	45
Glycine max	Pseudomonas putida H-2-3	Soil inoculation	Growth promotion	HPLC, UV/Reaction based detection		Higher level of total flavonoids in leaves	Flavonoid, phenolics	46
Glycine max	Curtobacterium sp. M84, Chryseobacterium balustinum Aur9, Pseudomonas fluorescens N21.4, Stenotrophomonas maltophilia N5.18	Soil inoculation	Disease resistance	HPLC		Increased level of daidzein family isoflavones in the entire plant when plants were treated by N5.18 and N21.4	Flavonoid	47
Glycine max	Bradyrhizobium japonicum	Spraying on seedling	Not determined	GC-MS, UPLC-QTOF MS (Non-targeted metabolomics)	PCA	Differential regulation of 166 metabolites in roots. Higher level of trehalose in treated plants	Glucoside, various metabolites	48
Glycine max	Bradyrhizobium japonicum	Soil inoculation	Growth promotion	GC-IT-MS, HPLC-UV/DAD		Productions of menthyl acetate, linalyl acetate and α-farnesene in shoots. Increased levels of malic acid. Lower level of acetic acid	Organic acid, terpenoid, volatiles	49
Glycine max	Bradyrhizobium japonicum	Soil inoculation	Not determined	HPLC-UV, GC-IT/MS		Decreased levels of sterols, triterpenes, volatiles and phenolics in seeds. Increased levels of organic acids and fatty acids	Organic acid, phenolics, terpenoid	50
Glycine max	Chryseobacterium balustinum Aur9 (CECT 5399), Pseudomonas fluorescens N21.4 (CECT 7620)	Cell culture	Not determined	HPLC/ESI-ITMS		Differential regulation of total isoflavonoids and individual isoflavonoids contents in calli in response to bacteria treatments, Higher level of total isoflavone with small elicitors of N21.4	Flavonoid	51
Glycine max	Pseudomonas fluorescens N21.4 CECT 7620, Stenotrophomonas maltophilia N5.18	Treatment on growth media	Not determined	HPLC		Higher levels of genistein in sprouts treated with N21.4. Increased level of total polyphenols in plants treated with N5.18	Flavonoid, phenolics	52
Glycine max, Macroptilium atropurpureum, Vigna unguiculata, Vigna radiata	Bradyrhizobium diazoefficiens 110spc4 and its mutants	Seed inoculation	Not determined	QTOF MS (Non-targeted metabolomics)	PCA	Changed levels of 153 metabolites in roots and nodules among the studied plant species. Higher levels of ribose in soybean, tartaric acid in mungbean, hydroxybutanoyloxybutanoate in siratro, and catechol in cowpea	Glycoside, organic acid, phenolics, various metabolites	53
Glycine max	Arthrobacter oxidans, Curtobacterium sp. SG041, Chryseobacterium balustinum, Bacillus subtilis HJ19, Bacillus sp., Pseudomonas fluorescens, Stenotrophomonas maltophilia, Stenotrophomonas maltophilia 6B2-1	Soil inoculation	Not determined	HPLC		Increased levels of isoflavonoids in seedlings when treated by N21.4. Levels of individual isoflavonoids, daidzin, glycitin, genistin, malonyl daidzin, malonyl genistin, daidzein, glycitein, and genistein were differentially regulated in response to bacteria treatments	Flavonoid	54
Glycine max	Chryseobacterium balustinum Aur9	Addition to hydroponics	Not determined	HPLC-MS/MS		Lower levels of quercetin and naringein in root exudates	Flavonoid	55
Gossypium hirsutum	9 Bacillus amyloliquefaciens	Seed inoculation	Anti-herbivory, Growth promotion	HPLC-ESI MS		Higher level of gossypol in leaves in response to treatment by bacteria consortium	Phenolics	56
Lycopersicum esculentum	Bacillus amyloliquefaciens FZB42 (B3), Pseudomonas sp. (B2), Pseudomonas jessenii RU47 (B4)	Seed inoculation	Not determined	UHPLC-IT-TOF, Non-targeted metabolomics	PCA	Differently regulated levels of two hydroxyoctadecadienoic acid derivatives in roots by all bacteria treatments. Decreased level of arachidonic acid by B4. Higher level of myristic acid by bacteria treatments	Organic acid	57
Mentha arvensis	Bacillus pumilus STR2, Exiguobacterium oxidotolerans STR36, Halomonas desiderata STR8	Seedling inoculation	Growth promotion	GC-MS		Higher essential oil total yield and increased essential oil content in shoots	AHC, carotenoid	58
Mentha piperita	Bacillus subtilis GB03, Azospirullum brasilense SP7, Pseudomonas fluorescens WCS417r	Volatile exposure	Not determined	GC-MS		Yield of total essential oil in shoots was increased. Levels of (+)-pilegone and (-)-menthone were increased by WCS417r treatment. Levels of (-)-menthol and (+)-menthofuran were differently regulated in response to bacteria treatment	AHC, terpenoid	59
Mentha piperita	Bacillus subtilis GB03, Pseudomonas fluorescens WCS417r, P. putida SJ04	Soil inoculation	Growth promotion	GC		Higher yield of total essential oil in shoots. Increased levels of monoterpenes in WCS417r-SJ04 combination treatment. Levels of (+) pulegone, (−) menthone, (−) menthol, 1,8-cineole, and linalool were increased by individual bacteria treatments	AHC, terpenoid	60
Mentha piperita	Pseudomonas putida SJ04, P. putida SJ25, P. putida SJ48	Plant culture	Growth promotion	GC		Increased essential oil yield in shoots. Level of menthone was increased by all bacterial treatments but menthol level was only increased in plants treated by SJ04 and SJ25	AHC, terpenoid	61
Ocimum basilicum	Bacillus subtilis GB03	Volatile exposure and root inoculation	Growth promotion	GC-MS		Higher essential oil yield and increased levels of α-terpineol and eugenol	AHC, terpenoid	62
Origanum majorana	Bradyrhizobium sp., Sinorhizobium meliloti Rm1021, Bacillus subtilis 09, Pseudomonas fluorescens WCS417r	Soil inoculation	Growth promotion	GC-MS		Higher essential oil yield in shoots. Differential regulation of cis-sabine hydrate, α-terpineol, terpinen-4-ol, and trans-sabine hydrate levels by each treatment	AHC, terpenoid	63
Origanum vulgare	Bacillus subtilis GB03, Azospirillum brasilense SP7, Pseudomonas fluorescens WCS417r	Soil inoculation	Growth promotion	GC-MS		Higher essential oil yield in shoots with treatments of WCS417r and SP7. γ-terpinene, trans-sabine hydrate, thymol levels were increased by all bacterial treatments. Level of cis-sabine hydrate was increased with treatments of WCS417r and SP7. Higher level of carvacrol in SP7	AHC	64
Oryza sativa	Azospirillum lipoferum 4B, Azospirullum sp. B510	Seedling inoculation	Disease resistance, Growth promotion	LC-MS, DAD, UV, Non-targeted metabolomics	PCA	Levels of flavonoids, hydroxycinnamic derivatives, and other metabolites in shoots and roots were differently regulated by each treatment	Flavonoid, phenolic	65
Oryza sativa	Azospirillum lipoferum 4B, Escherichia coli strain B6	Seed inoculation	Growth promotion	LC-MS	PCA	Levels of gallic acid, tannic acid, ferulic acid, and cinnamic acid in shoots and roots were differently regulated by each treatment	Organic acid, phenolics	66
Oryza sativa	Rhizobium leguminosarum bv. Phaseoli (RRE6), R. leguminosarum bv. Trifolii (ANU 843)	Seed inoculation	Growth promotion	HPLC		All bacterial treatments resulted in higher levels of gallic acid, tannic acid, ferulic acid, and cinnamic acid in leaves, stems and roots	Organic acid, phenolics	67
Pelargonium graveolens	Bacillus subtilis with fungi, Trichoderma harzianum, Glomus intraradices	Soil inoculation	Growth promotion	GC, UV/Reaction based detection		Essential oil yield, geraniol, total carotenoid, phenolics and flavonoids in leaves were increased by bacteria-fungus co-treatment. Level of citronellol was increased by single and by combined bacteria treatments	AHC, carotenoid, flavonoid, organic acid, phenolics, terpenoid	68
Piper betle	Serratia marcescens NBRI1213 with fungus	Soil inoculation	Disease resistance, Growth promotion	HPLC		The levels of gallic, protocatechui, chlorogenic, caffeic, ferulic, and ellagic acid in leaves and roots was altered by single bacteria and by bacteria-fungus co-treatment	Phenolics, organic acid	69
Pisum sativum	Pseudomonas fluorescens strain Pf4, Pseudomonas aeruginosa (Pag) with fungus	Seed inoculation	Disease resistance	HPLC		Higher levels of tannic acid, gallic acid, ferulic acid, cinnamic acid in leaves, stems, and roots. Bacteria combination and bacteria-fugus combination differently regulated the levels of individual compounds	Organic acid	70
Pisum sativum	Rhizobium leguminosarum strain P.SOM	Introduction into hydroponics	Anti-parasitic weeds	HPLC		Higher levels of gallic acid, cinnamic acid, naringenin, formononetin, ferulic acid, p-coumaric acid in roots	Phenolics, flavonoid, organic acid	71
Pisum sativum	Bacillus subtilis BHHU100, Pseudomonas aeruginosa PJHU15, with fungus, Trichoderma harzianum TNHU27	Seed inoculation	Disease resistance, Growth promotion	HPLC		Level of shikimic acid in leaves and collar regions was increased by bacteria-fungus co-treatment. Folic, chlorogenic, and tannic acid levels were differentially regulated. Cinnamic acid was produced by BHHU100	Organic acid, phenolics	72
Tagetes minuta	Azospirillum brasilense Sp7, Pseudomonas fluorescens WCS417r	Seed and soil inoculation	Growth promotion	GC-MS		Level of total polyphenols in shoot was increased by single bacteria treatment and by bacteria-fungus co-treatment. Yield of essential oil and tagetone, (Z) ocimenone, (Z)-β ocimene, and ocimemone levels were increased in response to treatment by bacteria consortium	Phenolics, terpenoid	73
Trigonella foenumgraecum	Bacillus firmus (PnB1), Bacillus flexus (PnB5), Bacillus licheniformis (PnB7). Bacillus sp. (EcB4), Bacillus cereus (CaB1), Bacillus thuringiensis (CaB2), Bacillus cereus (CaB3), Bacillus sp. (CaB5)	Seedling inoculation	Growth promotion	HPLC		Higher level of diosgenin in plantlets by CaB1, CaB2, CaB5, and EcB4	Terpenoid	74
Zea mays	Azospirillum brasilense UAP-154, CFN-535. A. lipoferum CRT1, Pseudomonas fluorescens F113	Seed inoculation	Growth promotion	HPLC		Differential regulation of benzoxazinoid derivatives and cyclic hydroxamic acids, apolar benzoxazinone derivatives in roots by each treatment	Benzoxazinoid	75
Zea mays	Azospirullum lipoferum CRT1, Pseudomonas fluorescens F113 with mycorrhizal fungus Glomus sp.	Seed inoculation	Growth promotion	HPLC, GC-MS	PCA	Levels of benzoxazinoids, simple phenols, phthalates, cinnamic acids and xanthone-like compounds in rice root were differentially regulated by single bacteria, by bacteria consortium, and by bacteria-fungus co-treatment	Benzoxazinoid	76
Zea mays	Pseudomonas putida KT2440	Seed inoculation	Disease resistance	UHPLC-QTOF-MS, ESI	PCA	Higher levels of phospholipid, diacylglycerophosphocholine in roots. Lower level of benzoxazinoid-glucoside	Benzoxazinoid	77
Zea mays in different cultivars	Azospirillum lipoferum CRT1, Azospirillum brasilense CFN-535, UAP-154	Seed inoculation	Growth promotion	HPLC, LC-MS, NMR, Non-targeted metabolomics	PCA	Levels of benzoxanzinoids in shoots and roots were differently regulated by each treatment	Benzoxazinoid	78
Zea mays in different cultivars	Azospirillum lipoferum CRT1	Seed inoculation	Growth promotion	GC-MS, Non-targeted metabolomics		Decreases in carbohydrates, gentobiose, acids of pentose phosphate pathway, TCA cycle or ascorbate/aldarate metabolism, phenylpropanoids, and cadaverine in xylem sap	Glycoside, various metabolites intermediates	79
Vetiveria zizanioides	Vetiver root associated bacteria		Not determined	GC		Variety of sesquiterpenes in axenically grown root were few and show abount level of β-caryophyllen. When β-caryophyllen was fed to bacteria, bacteria transform this compound into various sesquiterpenes	Terpenoid	80
Ornamental
Dianthus caryophyllus	Pseudomonas sp. strain WCS417r	Soil inoculation	Disease resistance	HPLC-MS		Higher levels of phytoalexins, hydroxydianthalexin B (or S, S methyl ester), methoxydianthramide A (or B, R, S, A methylester), in stems	Various phytoalexins	81
Pelargonium graveolens	Pseudomonas monteilii PsF84, Pseudomonas plecoglossicida PsF610	Soil inoculation	Growth promotion	GC		Increased essential oil yield. Higher levels of citronellol and geraniol in whole plant in response to PsF84 and PsF610 treatments	Terpenoid	82
Trees/ Shrub
Alnus glutinosa, Casuarina cunninghamiana	Frankia sp. strain CcI3, Frankia sp. Strain Cci1	Root inoculation	Not determined	GC-TOF MS, Non-targeted metabolomics		Changes in plant secondary metabolites in nodules to non-treated roots by bacteria treatments in two plant species. Levels of epicatechin, 3-methoxytyrosine, nitric acid, and 3,4 dihydroxybenzoin acid in nodules of C. cunninghamiana were increased. In A. glutinosa nodule, levels of caffeic acid, coniferin, isonicotinic acid and vanillic acid were increased	Flavonoid, organic acid, phenolics	83
Eucalyptus grandis, Eucalyptus globulus	Streptomyces spp. PM1, PM3, PM4, PM5, PM6, PM9	Root inoculation	Growth promotion	UV/Reaction based detection		Levels of total phenolic and flavonoids were differently regulated by plant species, plant parts and bacteria treatments	Phenolics, flavonoid	84
Eucalyptus grandis, Eucalyptus globulus	Streptomyces sp. PM9	Root inoculation	Disease resistance	HPLC, UV/Reaction based detection		Lower levels of phenolic and quercetin flavonoids in roots. Changes in total phenolic and flavonoids in sampling time and cultivars. Increased levels of chrologenic acid and coumarin in E. globulus roots. Increased level of caffeic acid in E. grandis shoots	Coumarin, flavonoid, organic acid, phenolics	85
Poplar clone 741 [Populus alba × (P. davidiana + P.simonii) × P. tomentosa]	Paenibacillus isolate 22	Stem inoculation	Growth promotion	GC-TOF MS	PCA, ICA, and HCA	Lower levels of organic acid intermediates in shoots	Organic acid intermediates	86
Quercus robur	Streptomyces sp. strain AcH 505	Soil inoculation	Disease resistance	qPCR, qRT-PCR, enzyme activity analysis, transcriptomics		Upregulations of transcriptomes of genes involved in the flavonoid, alkaloid, stilbenoid biosynthesis pathways in leaves of treated plants	Alkaloid, flavonoid, stilbenoid	87
Rubus sp.	Bacillus subtilis (N11.37), Pseudomonas aeruginosa (N17.35), Pseudomonas corrugate (N19.27), Pseudomonas fluorescens (N21.4), Stenotrophomonas maltophilia (N5.18), Stenotrophomonas maltophilia (N6.8)	Fruit inoculation	Disease resistance	HPLC-MS, UV/Reaction based detection		Lower levels of phenolic and flavonoids contents in fruits by N17.35. Anthocyanin levels were differently regulated by each treatment	Anthocyanin, flavonoid, phenolics	88
Rubus sp.	Pseudomonas fluorescens N21.4	Root inoculation	Growth promotion	UPLC-IT-TOF MS		Increased level of total phenolics in fruits. Higher levels of epicatechins and catechins in green and red fruits	Flavonoid, phenolics	89
Sambucus nigra		Removing phyllospheric microorganisms		LC-MS, Non-targeted metabolomics	PCA and PLS-DA	Differential regulation of plant secondary metabolites in flowers and leaves by an absence of phyllospheric microorganisms	Flavonoid, terpenoid	90
Vitis vinifera	Kocuria erythromyxa Rt5M10, Microbacterium imperiale Rz19M10, Terribacillus saccharophilus Rt17M10	Root inoculation	Disease resistance	GC-MS		Higher level of total terpenes in leaves. Levels of each terpenoids were differently regulated by treatments	Terpenoid	91
Vitis vinifera	Sphingomonas phyllosphaerae SpVs6, Enterobacter ludwigii EnVs6, Pantoea vagans PaVv7	Root inoculation	Not determined	UPLC, tandem mass spectrometry analysis	HCA and PCA	Differential regulation of secondary metabolites in stems and roots. Decreased levels of epicatechin gallate, procyanidin B1, taxifolin, and sum of quercetin-3-glucoside and quercetin-3-galactoside in stems in response to EnVs6 treatment	Flavonoid, organic acid, phenolics	92
*AHC: Aromatic hydrophobic compounds complex (essential oil)

## Sheet: Supplementary Table 2
Supplementary Table S2. Overview of different bacterial genera studied for their impact on the chemistry of different plant species.
Plant	Plant Species								Bacteria order											Bacteria species belong to bacteria order											References
Order	Family	No of Species in plant family	1	2	3	4	5	6	Actinomycetales	Bacillales	Burkholderiales	Enterobacteriales	Flavobacteriales	Oceanospirillales	Pseudomonadales	Rhizobiales	Rhodospirillales	Sphingomonadales	Xanthomonadales	Actinomycetales	Bacillales	Burkholderiales	Enterobacteriales	Flavobacteriales	Oceanospirillales	Pseudomonadales	Rhizobiales	Rhodospirillales	Sphingomonadales	Xanthomonadales
Model
Brassicales	Brassicaceae	1	Arabidopsis thaliana							2	1				1						Bacillus amyloliquefaciens, Bacillus subtilis	Burkholderia phytofirmans				Pseudomonas fluorescens					2, 3, 4, 5, 6, 7
Medicinal
Gentianales	Apocynaceae	1	Catharanthus roseus						1	1					1					Micrococcus sp.	Staphylococcus sciuri					Pseudomonas fluorescens					15, 16, 17
Asparagales	Asphodelaceae	1	Aloe barbadensis Miller								1	2			1							Burkholderia gladioli	Enterobacter hormaechei, Serratia marcescens			Pseudomonas synzantha					8
Asterales	Asteraceae	3	Artemisia annua	Atractylodes lancea	Stevia rebaudiana					2	1	2			4	1			1		Bacillus polymixa, Bacillus subtilis	Burkholderia gladioli	Enterobacter aerogenes, Serratia marcescens			Azotobacter chroococcum, Acinetobacter sp., Pseudomonas putida, Pseudonocardia sp.	Rhodopseudomonas sp.			Stenotrophomonas sp.	10, 11, 12, 13, 28, 29, 30
Boraginales	Boraginaceae	1	Arnebia hispidissima												1											Azotobacter chroococcum					9
Asterales	Campanulaceae	1	Codonopsis pilosula							1											Bacillus amyloliquefaciens										18
Fabales	Fabaceae	1	Taverniera cuneifolia							2						3					Bacillus aminovorans, Bacillus cereus						Agrobacterium rhizogenes, Agrobacterium tumefaciens, Rhizobium leguminosarum				31
Lamiales	Lamiaceae	3	Coleus forskohlii	Salvia miltiorrhiza hairy roots	Salvia officinalis					1					7	1					Bacillus cereus					Pseudomonas brassicacearum, Pseudomonas thivervalensis, Pseudomonas frederiksbergensis, Pseudomonas fasciculatum, Pseudomonas fluorescens, Pseudomonas fasciculatum, Pseudomonas putida	Rhizobium radiobacter				19, 25, 26, 27
Ranunculales	Papaveraceae	1	Papaver somniferum						5	6					1				1	Arthrobacter sp., Janibacter sp., Kocuria sp., Marmoricola sp., Microbacterium sp.	Bacillus lichniformis, B. subtilis, B. circulans, B. amyloliquefaciens, B. tequilensis and Bacillus. sp.					Acinetobacter sp.				Stenotrophomonas maltophilia	23, 24
Lamiales	Plantaginaceae	1	Bacopa monnieri							2											Bacillus pumilus, Exiguobacterium oxidotolerans										14
Solanales	Solanaceae	2	Datura innoxia	Hyoscyamus											2											Pseudomonas putida, Pseudomonas fluoresence	Agrobacterium rhizogenes				20, 21
Apiales	Araliaceae	1	Panax ginseng							1											Paenibacillus polymyxa										22
Crop plant
Apiales	Apiaceae	1	Daucus carota												1											Pseudomonas sp.					42
Asterales	Asteraceae	2	Chamomilla recutita	Tagetes minuta						2					1		1				Bacillus subtilis, Paenibacillus polymyxa					Pseudomonas fluorescens	Azospirillum brasilense				35, 73
Cucurbitales	Cucurbitaceae	1	Cucumis sativus						1		1				1					Promicromonospora sp.		Burkholderia cepacia				Acinetobacter calcoaceticus					40
Fabales	Fabaceae	6	Arachis hypogaea	Cicer arietinum	Dolichos biflorus	Glycine max	Pisum sativum	Trigonella foenumgraecum	4	8			1		5	4			1	Arthrobacter oxidans, Curtobacterium sp. Curtobacterium sp. Streptomyces sp.	Bacillus firmus, Bacillus flexus, Bacillus licheniformis, Bacillus cereus, Bacillus thuringiensis, Bacillus subtilis, Bacillus sp., Bacillus sp.,			Chryseobacterium balustinum		Azotobacter chroococcum, Pseudomonas aeruginosa, Pseudomonas fisi, Pseudomonas fluorescens, Pseudomonas putida	Bradyrhizobium Diazoefficiens, Bradyrhizobium japonicum, Rhizobium leguminosarum, Rhizobium sp.			Stenotrophomonas maltophilia	32, 36, 37, 38, 39, 43, 45, 46, 47, 48, 49, 50, 51, 52, 53, 54, 55, 70, 71, 72, 74
Geraniales	Geraniaceae	1	Pelargonium graveolens							1											Bacillus subtilis										68
Lamiales	Lamiaceae	5	Mentha arvensis	Mentha piperita	Ocimum basilicum	Origanum majorana	Origanum vulgare			3				1	2	2	1				Bacillus pumilus, Bacillus subtilis, Exiguobacterium oxidotolerans				Halomonas desiderata	Pseudomonas fluorescens, Pseudomonas putida	Bradyrhizobium sp., Sinorhizobium meliloti	Azospirillum brasilense			58, 59, 60, 61, 62, 63, 64
Malvales	Malvaceae	1	Gossypium hirsutum							1											Bacillus amyloliquefaciens										56
Piperales	Piperaceae	1	Piper betle									1											Serratia marcescens								69
Poales	Poaceae	3	Oryza sativa	Zea mays	Vetiveria zizanioides							1			2	1	3						Escherichia coli			Pseudomonas fluorescens, Pseudomonas putida	Rhizobium leguminosarum	Azospirillum lipoferum, Azospirillum brasilense, Azospirillum sp.			65, 66, 67, 75, 76, 77, 78, 79, 80
Rosales	Rosaceae	1	Fragaria x ananassa var. Selva												2											Pseudomonas fluorescens, Pseudomonas sp.					44
Solanales	Solanaceae	2	Capsicum annuum	Lycopersicum esculentum						1					2	1					Bacillus amyloliquefaciens					Pseudomonas jessenii, Pseudomonas sp.	Rhizonium legumonosarum				33, 34, 57
Zingiberales	Zingiberaceae	1	Curcuma longa							1					1		1				Bacillus megaterium					Azotobacter sp.		Azospirillum amazonese			41
Ornamental
Caryophyllales	Caryophyllaceae	1	Dianthus caryophyllus												1											Pseudomonas sp.					81
Geraniales	Geraniaceae	1	Geranium												2											Pseudomonas monteilii, Pseudomonas plecoglossicida					82
Tree/shrub
Dipsacales	Adoxaceae	1	Sambucus nigra																												90
Fagales	Betulaceae	1	Alnus glutinosa						1											Frankia sp.											83
Fagales	Casuarinaceae	1	Casuarina cunninghamiana						1											Frankia sp.											83
Fagales	Fagaceae	1	Quercus robur						1											Streptomyces sp											87
Myrtales	Myrtaceae	2	Eucalyptus grandis	Eucalyptus globulus					6											Streptomyces sp.											84, 85
Rosales	Rosaceae	1	Rubus sp.							1					3				1		Bacillus subtilis					Pseudomonas aeruginosa, Pseudomonas corrugate, Pseudomonas fluorescens				Stenotrophomonas maltophilia	88, 89
Malpighiales	Salicaceae	1	Poplar clone 741 [Populus alba × (P. davidiana + P.simonii) × P. tomentosa])							1											Paenibacillus isolate										86
Vitales	Vitaceae	1	Vitis vinifera L.						2	1		2						1		Kocuria erythromyxa, Microbacterium imperiale	Terribacillus saccharophilus		Enterobacter ludwigii, Pantoea vagans						Sphingomonas phyllosphaerae		91, 92
